# Supplementary material
Source: PubMed Central journal article supplement (PMC3064215)
Supplement: supp_M110.206714_jbc.M110.206714-1.pdf [file supp_M110.206714_jbc.M110.206714-1.pdf]

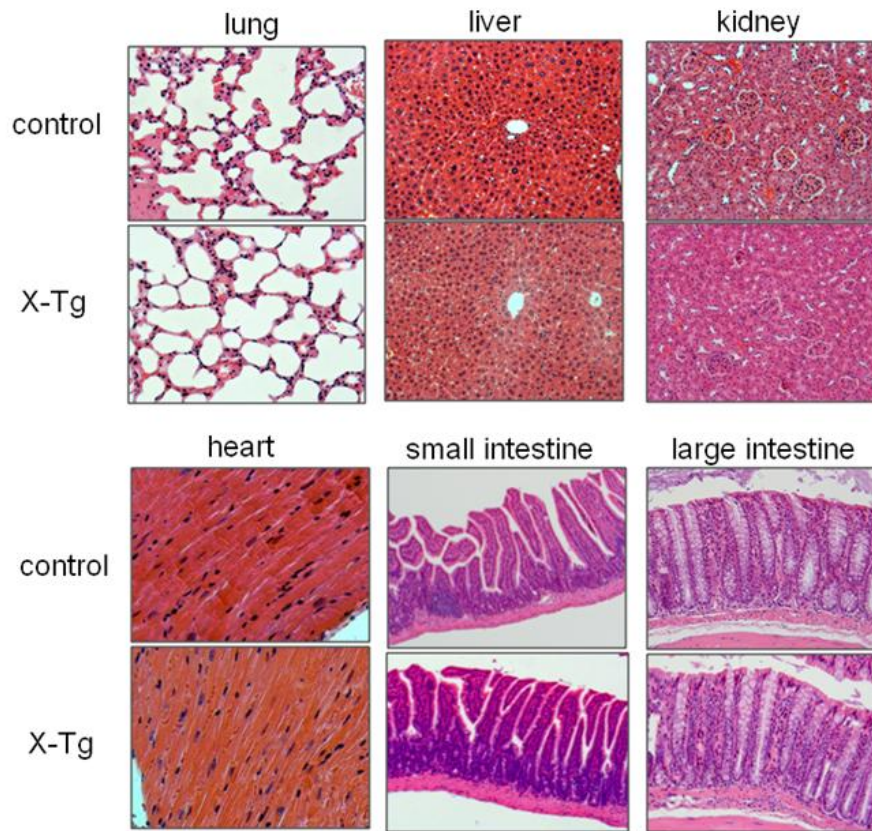

**Figure S1**

**Histological analyses of adult *PLA2G10*-Tg mice.**

Hematoxylin-eosin staining of liver, kidney, lung, heart, small intestine, and large intestine from adult (1-yr-old) control and *PLA2G10*-Tg (X-Tg) mice. The histology of these tissues did not differ between the genotypes. Original magnification; x100.
