# Supplementary material
Source: PubMed Central journal article supplement (PMC3064215)
Supplement: supp_M110.206714_jbc.M110.206714-2.pdf [file supp_M110.206714_jbc.M110.206714-2.pdf]

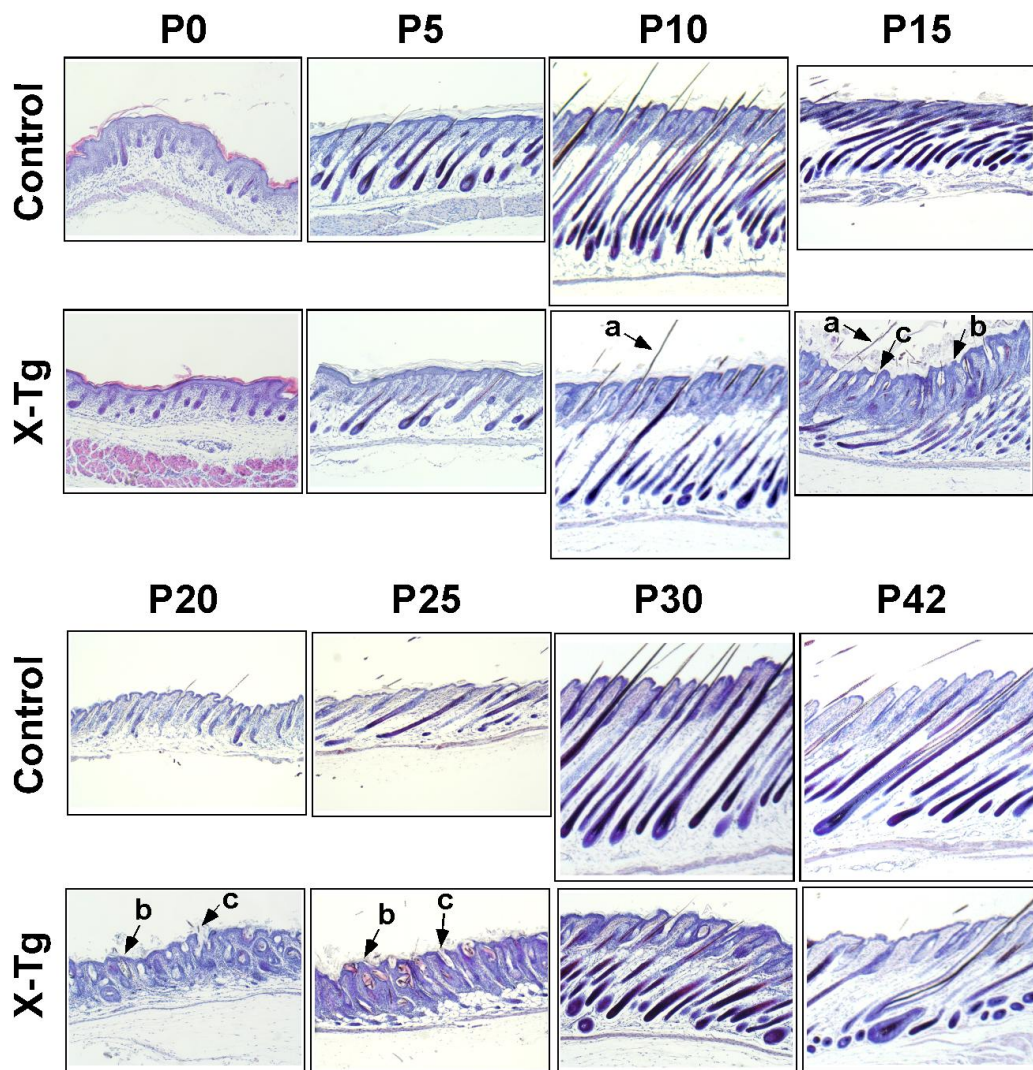

**Figure S2**

**Postnatal histological changes in skins of *PLA2G10*-Tg and control mice.** Sections from control and *PLA2G10*-Tg (X-Tg) mice at the indicated postnatal points were stained with hematoxylin and eosin. There were typical signs of abnormal skin and hair differentiation in X-Tg mice after P10, where hair shafts looked thin and distorted (arrows a); epidermal thickening (arrows b) and enlarged hair follicles (arrows c) were obvious; and some follicles had degenerated into cyst-like structures (arrows d). Hair follicles in control mice were synchronized in catagen at P15, telogen (resting phase) at P20, and transition from telogen to the next (second) anagen at P25, whereas the majority of hair follicles in X-Tg mice were still in telogen at P25. Moreover, although hair follicles in control skin were entirely in anagen at P30-P42, follicles exhibiting the telogen feature still existed in Tg skin, suggesting delayed transition of the Tg follicles to the next anagen. Bars represent 20  $\mu\text{m}$ .
