# Supplementary material
Source: PubMed Central journal article supplement (PMC3064215)
Supplement: supp_M110.206714_jbc.M110.206714-4.pdf [file supp_M110.206714_jbc.M110.206714-4.pdf]

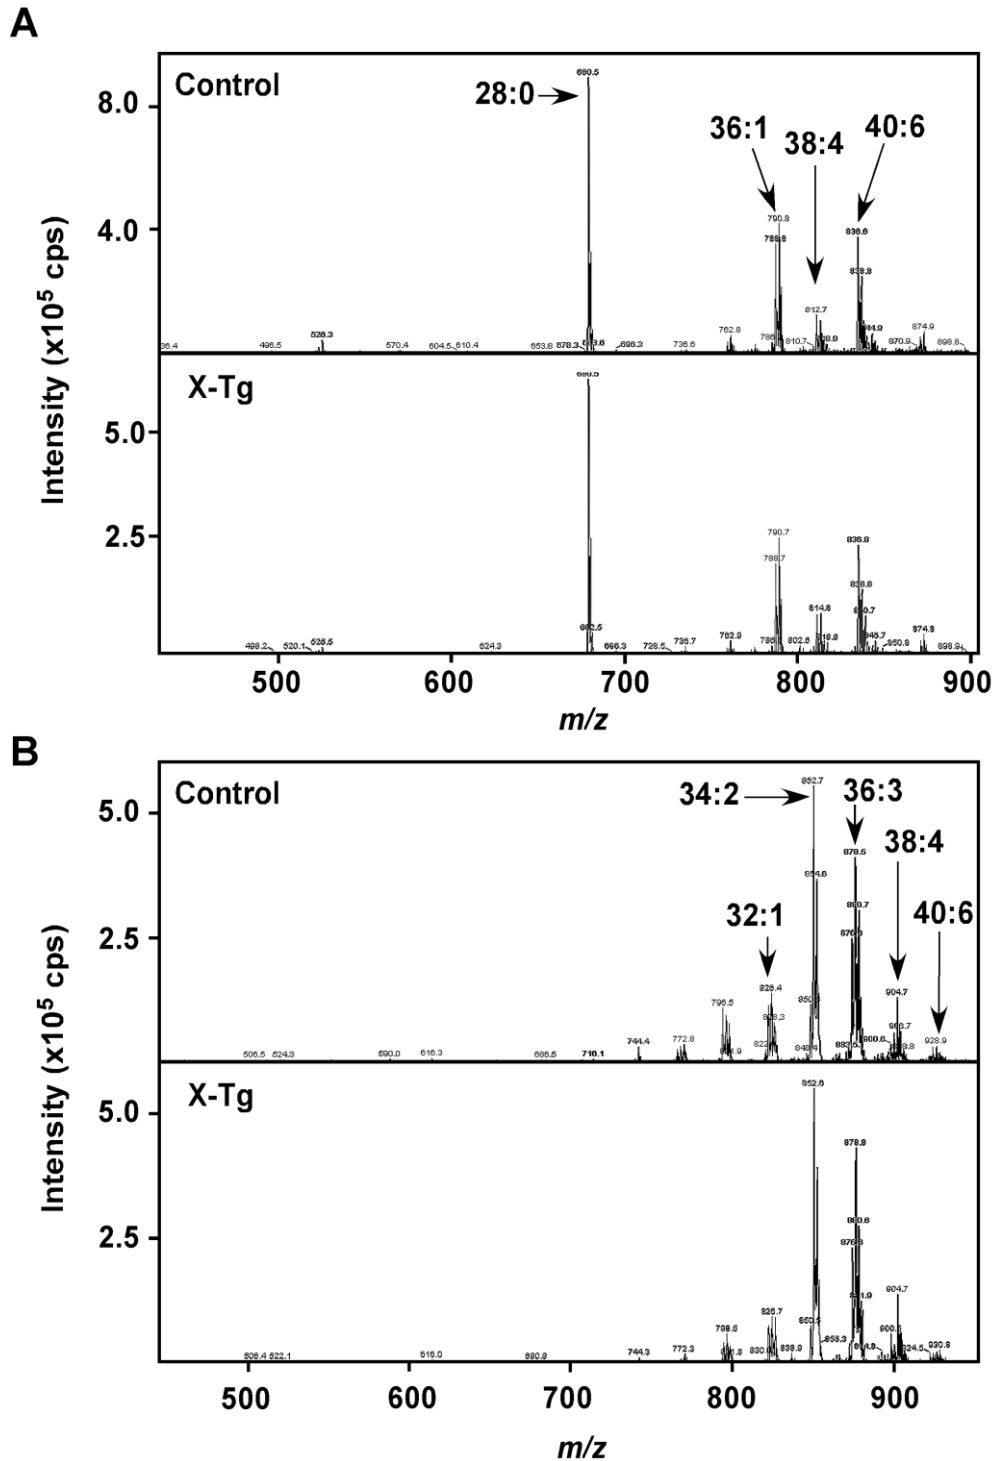

**Figure S4**

ESI-MS analyses of phosphatidylserine and phosphatidylinositol in skins from control and *PLA2G10-Tg* (X-Tg) mice. There were no differences in the composition of phosphatidylserine (A) and phosphatidylinositol (B) molecular species between the genotypes.
