# Supplementary material
Source: PubMed Central journal article supplement (PMC3064215)
Supplement: supp_M110.206714_jbc.M110.206714-5.pdf [file supp_M110.206714_jbc.M110.206714-5.pdf]

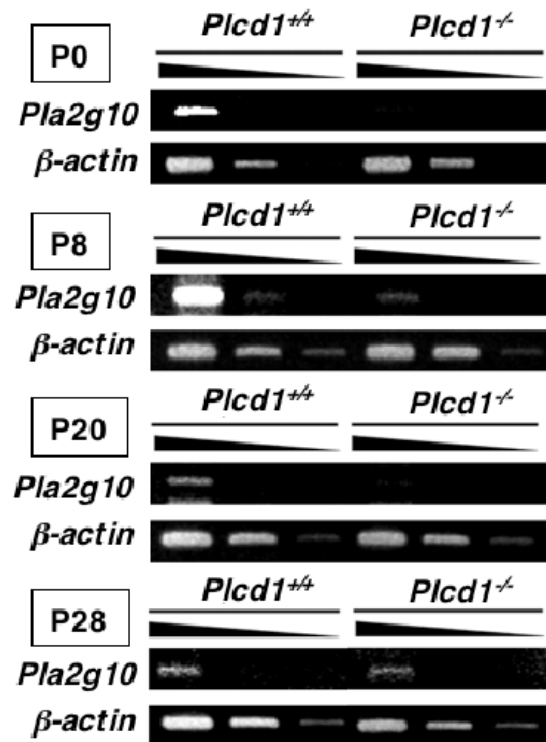

**Figure S5**

**Reduced expression of *Pla2g10* mRNA in the skin of *Plcd1*<sup>-/-</sup> mice.** RT-PCR analysis of the expression of *Pla2g10* and *Actb* ( $\beta$ -actin) in *Plcd1*<sup>+/+</sup> and *Plcd1*<sup>-/-</sup> skin at the indicated postnatal time points. *Actb* was used as a loading control. Four-fold serially diluted RT products were used for PCR amplification as a template. A representative result of two independent experiments is shown.
