# Supplementary material
Source: PubMed Central journal article supplement (PMC3064215)
Supplement: supp_M110.206714_jbc.M110.206714-7.pdf [file supp_M110.206714_jbc.M110.206714-7.pdf]

**Supplementary Table S1**  
**Sequences of primers for quantitative RT-PCR analysis.**

| Gene     | Accession Number | Forward Primer                                  | Reverse Primer            | Probe Number (Roche) |
|----------|------------------|-------------------------------------------------|---------------------------|----------------------|
| 18s rRNA | NR_003286        | TCGAGGCCCTGTAATTGGAA                            | CCCTCCAATGGATCCTCGTT      | -                    |
| β-actin  | NM_007393        | CTAAGGCCAACCGTGAAAAG                            | ACCAGAGGCATACAGGGACA      | 64                   |
| Pla2g10  | NM_011987        | Taq man probe (Applied Biosystems) No. 00449532 |                           |                      |
| Ptgs1    | NM_008969        | CCTCTTCCAGGAGCTCACA                             | TCGATGTCACCGTACAGCTC      | 46                   |
| Ptgs2    | NM_011198        | CACCTCTGCGATGCTCTTC                             | TGGATTGGAACAGCAAGGAT      | 27                   |
| Ptgs     | NM_022415        | GCACACTGCTGGTCATCAAG                            | ACGTTTCAGCGCATCCTC        | 83                   |
| Ptgs2    | NM_133783        | CCCAGGAAGGAGACAGCTT                             | AGGTAGGTCCTGAGGGCACTAAT   | 82                   |
| Ptgs3    | NM_019766        | CGAATTTTGACCGTTTCTCTG                           | TGAATCATCATCTGCTCCATCT    | 9                    |
| Ptger4   | NM_008965        | CGGTTCCGAGACAGCAA                               | CGGTTTCGATCTAGGAATGGT     | 102                  |
| Alox5    | NM_009662        | GGCACGGCAAAAACAGTATC                            | TGGCATTTGGCATCAATACTC     | 58                   |
| Alox12   | NM_007440        | CAGGGAGAGGGAATCCTGA                             | CGATACTTCTGGAAGACATCTAAGG | 51                   |
| Alox12b  | NM_009659        | ACTTTGGTCTCGATGGCAAC                            | CAATCAGGCCCAGGAGTCT       | 105                  |
| Alox12e  | NM_145684        | CTCCAGGGATGGAAGACGTA                            | TCAACTTCGAACAGAGATCCAG    | 78                   |
| Alox15   | NM_009660        | GGGGATGGAGAAGCTACAGG                            | TCCGCTTCAAACAGAGTGC       | 42                   |
| Alox15b  | NM_009661        | CGCCAGAAGGAGCTTGAGT                             | GGCCAACCTTCAATGTAAGTCT    | 29                   |
| Alox3    | NM_011786        | GGCCTCACTGATCTTCAACG                            | GTCAGGAGACCTCGAATCTT      | 4                    |
| Shh      | NM_009170        | ACCCCGACATCATATTTAAGGA                          | TTAACTTGTCTTTGCACCTCTGA   | 32                   |
| Bmp4     | NM_007554        | GAGGAGTTTCCATCACGAAGA                           | GCTCTGCCGAGGAGATCA        | 89                   |
| Msx2     | NM_013601        | AGGAGCCCAGCAGATACT                              | GTTCCTCAGGGTGCAGGT        | 70                   |
| Lef1     | NM_010703        | TCCTGAAATCCCCACCTTC                             | ACCCGTGATGGGATAAACAG      | 94                   |
| Foxn1    | NM_008238        | TGACGGAGCACCTCCCTTAC                            | GACAGGTTATGGCGAACAGAA     | 68                   |
| Gata3    | NM_008091        | TTATCAAGCCCAAGCGAAG                             | TGGTGGTGGTCTGACAGTTC      | 108                  |
| S100a9   | NM_009114        | CACCCTGAGCAAGAAGGAAT                            | TGTCATTTATGAGGGCTTCATT    | 31                   |
| Flg1     | XM_485270        | AGCACGGCTCCGATACTA                              | AACTGCTGCTGCGTTGCT        | 49                   |
| Krt1     | NM_008473        | TTTGCCTCCTTCATCGACA                             | GTTTTGGTCCGGGTTGT         | 62                   |
| Krt14    | NM_016958        | ATCGAGGACCTGAAGAGCAA                            | TCGATCTGCAGGAGGACATT      | 83                   |
| Tgm1     | NM_019984        | GCCCTTGAGCTCCTCATTG                             | CCCTTACCCACTGGGATGAT      | 10                   |
| Tgm2     | NM_009373        | GGTGATCCTCGCTTGAGTGT                            | CTCCAAATCACACCTCTCCAG     | 17                   |
| Krt6a    | NM_008476        | AGTTTGCTCCTTCATCGAC                             | TGCTCAAACATAGGCTCCAG      | 84                   |
| Krt17    | NM_010663        | GGAGCTGGCCTACCTGAAG                             | ACCTGGCCTCTCAGAGCAT       | 63                   |
| Krt33a   | NM_027983        | GGCCTACTTCAGGACCATTG                            | CGTCTCAGATTTGCCACAC       | 84                   |
| Krt71    | NM_019956        | AGCTGAGGAATGTGCGTGA                             | GCCGGTTGATCTCCTCCT        | 22                   |
| Krt85    | NM_016879        | CCAGGATGTGGAGTACCAGA                            | GCCAGTTTTGGGGCTAC         | 15                   |
| Klk6     | NM_011177        | CCTGTGCTTGGTCTTGCTA                             | TCCATGAACCACCTTCTCCT      | 64                   |
| Klk7     | NM_011872        | CAGGGAGTGCAAGAAGGTGT                            | TGTCGTTGCACACCAAGG        | 3                    |
| Klk8     | NM_008940        | GCAGCAATGGAGCTGACAC                             | TGAGCCCCATGAGGTGAT        | 1                    |
| Mtsp1    | AF042822         | CCTCTCCTACGACTCCAACG                            | GATGCACCGTCCAGTCTTG       | 104                  |
| Ctsl     | NM_009984        | CAAATAAGAATAAATATTGGCTTGTA                      | TGTAGCCTTCCATACCCCAT      | 60                   |
| Furin    | NM_011046        | CTGAGGAGGCCTTCTTTCG                             | CCTGAGGCCCAGACAAAAG       | 81                   |
| Cst6     | NM_028623        | CCAAAGTCATCGATGCAAAA                            | TGCTTTCTATGTCCAAAGTCAGG   | 83                   |
| Spink5   | NM_001081180     | CATGTTGACGTAAGAGTGAAGGT                         | AGGCTCGAAAATCACTGCAC      | 66                   |
